1 **Adapting COVID-19 research infrastructure to capture influenza and**  
2 **RSV alongside SARS-CoV-2 in UK healthcare workers winter**  
3 **2022/23: Evaluation of the SIREN Winter Pressures pilot study**

4

5 Sophie Russell<sup>1¶\*</sup>, Katie Munro<sup>1¶\*</sup>, Sarah Foulkes<sup>1</sup>, Jonathan Broad<sup>1</sup>, Dominic Sparkes<sup>1</sup>, Ana Atti<sup>1</sup>,  
6 Jasmin Islam<sup>1</sup>, Susan Hopkins<sup>1</sup>, Victoria Hall<sup>1</sup>, SIREN study group<sup>1^</sup>

7

8 <sup>1</sup> UK Health Security Agency (UKHSA)

9

10 \*Corresponding authors:

11 [sophie.russell@ukhsa.gov.uk](mailto:sophie.russell@ukhsa.gov.uk) (SR)

12 [katie.munro@ukhsa.gov.uk](mailto:katie.munro@ukhsa.gov.uk) (KM)

13

14 <sup>¶</sup> These authors contributed equally to this work.

15

16 <sup>^</sup> Membership of the SIREN study group is provided in Supporting Information.

NOTE: This preprint reports new research that has not been certified by peer review and should not be used to guide clinical practice.

## 17 **Abstract**

## 18 **Background**

19 In 2022, with high early winter respiratory virus circulation, SIREN, a prospective healthcare  
20 worker cohort study monitoring SARS-CoV-2, ran a pilot study introducing multiplex PCR  
21 testing for SARS-CoV-2, influenza A/B, and RSV to investigate winter pressures. Three  
22 pathways were trialed: (A) on-site swabbing with local laboratory testing, (B) on-site  
23 swabbing with UKHSA-commissioned laboratory testing, and (C) postal swabbing with  
24 UKHSA-commissioned laboratory testing. Here, we compare pathways in relation to  
25 recruitment, testing coverage, participant acceptability, and UKHSA SIREN research team  
26 feedback.

## 28 **Methods**

29 We conducted a mixed methods evaluation using metrics of quality assurance and study  
30 fidelity (participant recruitment and retention; multiplex PCR testing timing and coverage), an  
31 adapted NIHR 'participant in research' feedback questionnaire, and thematic analysis of a  
32 UKHSA SIREN research team workshop.

## 34 **Results**

35 With 7,774 participants recruited, target recruitment (N=7,500) was achieved. Thirty-nine  
36 sites took part in the sub-study (4,289 participants). Thirty-three used pathway A, and six  
37 used pathway B. 3,485 participants enrolled to pathway C (27.8% of invitees). The median  
38 number of tests per participant was similar across pathways (6; 4; 5). However, sites using  
39 local laboratories showed a wide variation in the date they switched to multiplex testing (28<sup>th</sup>  
40 November 2022 to 16<sup>th</sup> March 2023). Consequently, influenza and RSV testing coverage  
41 was higher for pathways using UKHSA-commissioned laboratories (100.0% vs 45.6% at

42 local laboratories). 1,204/7,774 (15.5%) participants completed the feedback survey. All  
43 pathways were acceptable to participants; 98.9% of postal and 97.5% of site-based  
44 participants 'would consider taking part again'.

45

## 46 **Conclusion**

47 Transitioning SARS-CoV-2 PCR testing to include influenza and RSV was challenging to  
48 achieve rapidly across multiple sites. The postal testing pathway proved more agile, and  
49 UKHSA-commissioned laboratory testing provided more comprehensive data collection than  
50 local laboratory testing. This sub-study indicates that postal protocols are effective,  
51 adaptable at pace, and acceptable to participants.

## 52 Introduction

53 In the UK, winter 2022-23 was anticipated to be particularly challenging, with relaxation of  
54 non-pharmaceutical interventions put in place to reduce COVID-19 transmission (e.g., social  
55 distancing; masking) increasing rates of circulating respiratory viruses. This effect had been  
56 seen in Australasian data where there was an increase in influenza cases, hospitalisations,  
57 and deaths (1) (2). The SARS-CoV-2 Immunity and Reinfection EvaluationN (SIREN) study,  
58 led by the UK Health Security Agency (UKHSA), was well-placed to adapt its existing  
59 infrastructure set up during the COVID-19 pandemic to include multiplex Polymerase Chain  
60 Reaction (PCR) testing (SARS-CoV-2; influenza A, influenza B and RSV). We set up a pilot  
61 study (the SIREN Winter Pressures sub-study) to investigate the compounding burden of  
62 these three respiratory infections in healthcare workers (HCWs) (3) .

63  
64 The overall design and methods of the Winter Pressures sub-study, and the wider SIREN  
65 study, have been described elsewhere (3, 4). The Winter Pressures sub-study was a nested  
66 longitudinal cohort sub-study of HCWs within the SIREN study running from 28<sup>th</sup> November  
67 2022 to 31<sup>st</sup> March 2023. Expanding the study to incorporate influenza A, influenza B and  
68 RSV testing required rapid adjustment of the protocol. In the original SIREN study,  
69 participants attended hospital sites to undergo fortnightly SARS-CoV-2 PCR testing and  
70 completed an online fortnightly questionnaire on symptoms, exposures, and sick days. The  
71 Winter Pressures sub-study aimed to determine the incidence and impact of SARS-CoV-2;  
72 influenza A, influenza B and RSV on the healthcare workforce using multiplex testing. The  
73 secondary objective was to evaluate the effectiveness of seasonal influenza vaccine against  
74 infection, and power calculations required a sample size of 7,500 participants testing  
75 fortnightly to achieve this (3).

76  
77 Participant recruitment proved challenging to achieve at pace, with sites facing a range of  
78 barriers including site study team capacity, laboratory availability, and access to multiplex

79 machines. To increase the likelihood of meeting participant recruitment targets, in parallel to  
80 testing at hospital sites, a new, centrally-managed testing pathway was established for  
81 participants to undertake PCR swab via postal kits.

82

83 The sub-study comprised of three PCR testing pathways: Pathway A: fortnightly swabs were  
84 taken and tested locally at hospital sites. Pathway B: fortnightly swabs were taken locally at  
85 hospital sites but sent to UKHSA-commissioned laboratories for testing. Pathway C:  
86 fortnightly swabs were sent to participants via the post to perform at home and returned to  
87 UKHSA-commissioned laboratories for testing.

88

89 Home-based methodologies similar to Pathway C are growing in popularity for being  
90 resource-effective, reducing research costs, and reflecting a participant-centred design (5,  
91 6). However, existing research lacks comparable information on key metrics, and does not  
92 address HCW studies where the site is also their place of work (7).

93

94 We evaluated postal and site-based testing pathways by comparing recruitment, multiplex  
95 PCR testing coverage, participant experience and acceptability, and study delivery via  
96 UKHSA SIREN research team feedback. This will inform future research protocol design,  
97 enabling comparison of postal and site-based testing options.

98

## 99 **Methods**

100 We conducted a process evaluation of the SIREN Winter Pressures sub-study using mixed  
101 methods, to compare the performance and acceptability of postal and site-based testing.

102

103 We used the following quantitative and qualitative data:

- 104 1. Metrics of quality assurance and study fidelity (participant recruitment and retention,  
105 timing of introduction and coverage of multiplex PCR testing)
- 106 2. Participants research experience survey
- 107 3. UKHSA SIREN research team workshop

108 The methods here are informed by guidance on process evaluation from the Medical  
109 Research Council (8).

110

## 111 **Metrics of quality assurance and study fidelity**

### 112 **Recruitment and retention**

113 In November 2022, all SIREN sites that intended to offer participant testing until March 2023  
114 were invited to join the SIREN Winter Pressures sub-study via an online survey.

115

116 Sites could choose to conduct multiplex PCR swabbing and testing locally (Pathway A) or  
117 testing via UKHSA-commissioned laboratories (Pathway B). Participants at sites who joined  
118 the sub-study were sent an updated Participant Information Leaflet (PIL) informing them of  
119 the switch to multiplex testing, and were given the opportunity to withdraw from the study if  
120 they did not wish to continue. Consent was implied by continuing to undergo testing. Where  
121 possible, participants who had previously been enrolled in the study but were inactive (due  
122 to completing their period of follow-up) were re-recruited and consented to testing within the  
123 sub-study.

124

125 Participants from sites not taking part in the SIREN Winter Pressures sub-study were re-  
126 recruited and consented to join via a postal pathway (Pathway C), between 13<sup>th</sup> December  
127 2022 and 24<sup>th</sup> January 2023. This pathway did not require on-site swabbing and testing.

128

129 For Pathways A and B, we recorded the number of sites joining the sub-study and the  
130 number of participants enrolled at each site when the sub-study went live.

131 For Pathway C, we recorded the number of participants consented and the date they  
132 consented.

133

134 To withdraw from the study, participants were required to complete a withdrawal survey. We  
135 describe recruitment, retention, and reason for withdrawal by site-based versus postal  
136 swabbing.

137

### 138 **Timing of introduction and coverage of multiplex PCR testing**

139 For sites in Pathway A, we recorded the date they switched to multiplex testing. Where this  
140 was unavailable, the date the PILs were sent to their participants was used (as a proxy for  
141 the switch to multiplex testing).

142

143 For sites in Pathway B, the date the PILs were sent to their participants was used as the  
144 date swabs should be sent to UKHSA-commissioned laboratories for multiplex testing.

145

146 For participants in Pathway C, we recorded the date the postal PCR swabs were taken.

147 For all pathways, we calculated swab return rate as the proportion of participants who had  
148 returned at least one swab for PCR testing, and calculated the median number of tests per  
149 participant. We described the number of monoplex (SARS-CoV-2 only) PCR results and the  
150 number of multiplex (SARS-CoV-2 plus influenza and/or RSV) PCR results over time, both  
151 overall and by pathway.

152

### 153 **Participant survey**

154 A bespoke adaptation of the standardised national NIHR participant research experience  
155 survey was created for participants (S1 File) (9). This was an 11-item survey that included  
156 quantitative and qualitative assessments based on participant experience. The quantitative  
157 elements included participants' views on working with the UKHSA and site SIREN teams,

158 the accessibility of testing, communication, and overall experience, and, for those on the  
159 postal pathway, whether they would recommend their pathway. Participants rated their views  
160 based on a 5-point Likert scale from strongly agree to strongly disagree. The survey included  
161 two free text boxes that encouraged participants to provide positive feedback or suggested  
162 improvements without limit.

163

164 Data were collated via Snapsurvey, an online survey tool, and stored securely on UKHSA  
165 internal servers. This questionnaire was sent to all participants who completed the SIREN  
166 Winter Pressures sub-study. Survey responses were anonymous. Participants were required  
167 to select their swabbing pathway within the survey to enable a comparison of participant  
168 experience between site-based and postal study designs. Site-based pathways (Pathways A  
169 and B) were grouped for this analysis as the participant experience for both pathways  
170 involved site-based swabbing. A comparison of responses was made between site-based  
171 and postal pathways using a Chi-squared test.

172

## 173 **UKHSA SIREN research team workshop**

174 All researchers in the SIREN team were invited to attend a workshop to aid evaluation of the  
175 Winter Pressures sub-study. Feedback on the process of study set up and delivery was  
176 collected, and organised around core workstreams (e.g., laboratory, ethics, data collection,  
177 communications). Feedback was written up into long-form minutes that were thematically  
178 analysed.

179

## 180 **Thematic Analysis**

181 All free text questions from the participant survey and SIREN research team workshop  
182 feedback minutes were thematically analysed. A pragmatic, iterative, adapted form of  
183 framework analysis was adopted (10-12).

184



185 Two independent researchers familiarised themselves with the qualitative data from both  
 186 sources and independently defined key themes and sub-themes based on participant and  
 187 SIREN research team responses. Themes were compared and agreed by consensus, and  
 188 presented to other members of the team in the case of query or non-agreement. Themes,  
 189 sub-themes and counts were summarised. The research study team then collectively  
 190 discussed to finalise themes.

191

## 192 Results

193 A summary of the key metrics from each pathway is available in Table 1.

194 **Table 1: Comparison of Pathways A, B, and C**

|                                                         | Pathway A                                                                     | Pathway B                                                                                         | Pathway C                                                                                                |
|---------------------------------------------------------|-------------------------------------------------------------------------------|---------------------------------------------------------------------------------------------------|----------------------------------------------------------------------------------------------------------|
| <b>Site recruitment</b>                                 | All active sites invited, those with capacity took part                       | Sites interested in Pathway A, but without capacity for on-site multiplex, were offered Pathway B | No site recruitment                                                                                      |
| <b>Participant recruitment</b>                          | Participants automatically enrolled, with an option to opt-out via withdrawal | Participants automatically enrolled, with an option to opt-out via withdrawal                     | Participants not enrolled at a Pathway A or B site were invited to take part via an opt-in online survey |
| <b>PCR swabbing and testing</b>                         | PCR swabs taken on-site and tested at local hospital laboratories             | PCR swabs taken on-site, but sent to UKHSA-commissioned laboratories for testing                  | PCR swabs taken at-home, and returned to UKHSA-commissioned laboratories for testing                     |
| <b>Multiplex testing start date</b>                     | Range: 28 <sup>th</sup> November 2022 to 16 <sup>th</sup> March 2023          | Range: 28 <sup>th</sup> November 2022 to 7 <sup>th</sup> February 2023                            | Range: 22 <sup>nd</sup> December 2022 to 24 <sup>th</sup> January 2023                                   |
| <b>Median number tests per participant</b>              | 6 (IQR: 4-7)                                                                  | 4 (IQR: 3-5)                                                                                      | 5 (IQR: 4-6)                                                                                             |
| <b>Proportion of returned tests that were multiplex</b> | 45.6%                                                                         | 100.0%                                                                                            | 100.0%                                                                                                   |

195

## 196 Recruitment and retention

197 Of the 65 sites invited to the sub-study, 39 (60.0%) opted to join, with 33 sites testing locally  
 198 (Pathways A) and six sites testing at UKHSA-commissioned laboratories (Pathway B). In  
 199 total, 4,289 participants were consented into the sub-study via sites (Pathways A: n=3,713;  
 200 Pathway B: n=576).

201

202 Of the 12,549 participants invited to join the postal testing pathway (Pathway C), 3,485  
203 (27.8%) opted to join the sub-study.

204

205 Retention across both site-based and postal pathways was high, with 4,138 (96.5%) of site-  
206 based participants, and 3,064 (87.9%) of postal participants remaining in follow-up until 31<sup>st</sup>  
207 March 2023.

208

209 Overall, 572 participants withdrew from the sub-study. The most common withdrawal reason  
210 for both site-based and postal pathways was being unable to stay in the study due to  
211 workload and/or work commitments (290/572; 50.7%) (Table 2). Compared to postal  
212 participants, a higher proportion of site-based participants reported withdrawing due to  
213 logistical issues with attending appointments (14/152; 9.2% vs 5/420; 1.2%) and difficulties  
214 with accessing testing (8/152; 5.3% vs 4/420; 1.0%). Compared to site-based participants, a  
215 higher proportion of postal participants reported withdrawing due to the frequency of testing  
216 (28/420; 6.7% vs 2/152; 1.3%) and disliking the testing method (19/420; 4.5% vs 0/152;  
217 0.0%).

218 **Table 2: Number of participants withdrawn by withdrawal reason and pathway**

| Withdrawal Reason                             | All Participants |      | Site-based participants |      | Postal participants |      |
|-----------------------------------------------|------------------|------|-------------------------|------|---------------------|------|
|                                               | n                | %    | n                       | %    | n                   | %    |
| Workload and/or other work commitments        | 290              | 50.7 | 66                      | 43.4 | 224                 | 53.3 |
| Moving sites/leaving the healthcare workforce | 56               | 9.8  | 24                      | 15.8 | 32                  | 7.6  |
| Frequency of testing is too high              | 30               | 5.2  | 2                       | 1.3  | 28                  | 6.7  |
| Medical reasons                               | 25               | 4.4  | 11                      | 7.2  | 14                  | 3.3  |
| Logistical issues with attending appointments | 19               | 3.3  | 14                      | 9.2  | 5                   | 1.2  |
| Dislike the testing methods                   | 19               | 3.3  | 0                       | 0.0  | 19                  | 4.5  |
| Difficulties with accessing testing           | 12               | 2.1  | 8                       | 5.3  | 4                   | 1.0  |
| Maternity leave/pregnancy                     | 4                | 0.7  | 3                       | 2.0  | 1                   | 0.2  |
| Preferred testing at site                     | 3                | 0.5  | 0                       | 0.0  | 3                   | 0.7  |
| Lack of results reporting                     | 3                | 0.5  | 0                       | 0.0  | 3                   | 0.7  |
| Impact of asymptomatic positives              | 2                | 0.3  | 2                       | 1.3  | 0                   | 0.0  |
| Issues with repeat positive results           | 1                | 0.2  | 0                       | 0.0  | 1                   | 0.2  |

|              |            |              |            |              |            |              |
|--------------|------------|--------------|------------|--------------|------------|--------------|
| Other        | 86         | 15.0         | 20         | 13.2         | 66         | 15.7         |
| Not stated   | 22         | 3.8          | 2          | 1.3          | 20         | 4.8          |
| <b>Total</b> | <b>572</b> | <b>100.0</b> | <b>152</b> | <b>100.0</b> | <b>420</b> | <b>100.0</b> |

219 *Site-based participants (Pathways A and B): Participants swabbing at hospital sites*

220 *Postal participants (Pathway C): Participants swabbing at home*

221

## 222 **Timing of introduction and coverage of multiplex testing**

223 Between 28<sup>th</sup> November 2022 and 31<sup>st</sup> March 2023, 76.8% of participants (5,967/7,774)

224 completed at least one SARS-CoV-2 test, and 60.9% (4,735) completed at least one

225 multiplex test. Overall, 26,556 SARS-CoV-2 PCR tests were performed, of which 73.0%

226 (19,396) were multiplex. Swab return rate was slightly higher for participants in Pathway C

227 (80.5%) compared to Pathways A and B (73.7% and 73.6%, respectively). The median

228 number of tests per participant was similar across pathways (Pathway A: 6, IQR=4-7;

229 Pathway B: 4, IQR=3-5; Pathway C: 5, IQR=4-6). However, only 45.6% of PCR tests were

230 multiplex in Pathway A, compared to 100.0% in Pathways B and C (Fig 1).

### 231 **Fig 1: Number of participants recruited and tested per fortnight, by pathway.**

232 *“Recruited” refers to the number of participants enrolled based on site/participant start dates.*

233 *Pathway A: On-site PCR swabbing, swabs analysed at local hospital laboratories*

234 *Pathway B: On-site PCR swabbing, swabs analysed at UKHSA-commissioned laboratories*

235 *Pathway C: At-home PCR swabbing, swabs analysed at UKHSA-commissioned laboratories*

236

237 On retrospective questioning of sites in Pathway A, the dates they changed from testing for

238 SARS-CoV-2 alone to multiplex PCR ranged from 28<sup>th</sup> November 2022 (which was the sub-

239 study start date) to 16<sup>th</sup> March 2023; the median date sites switched was 15<sup>th</sup> December

240 2022. For Pathway B, the site start date ranged from 28<sup>th</sup> November 2022 to 7<sup>th</sup> February

241 2023 and all swabs sent to UKHSA-commissioned laboratories were tested on multiplex

242 assays.

243 Pathway C participants were first recruited on 13<sup>th</sup> December 2022, and the first samples

244 were taken on 22<sup>nd</sup> December 2022. All samples were tested on multiplex.

245

## 246 Participant survey

247 1,204/7,774 (15.5%) participants completed the participant research experience survey  
248 about their experience of the Winter Pressures sub-study. Of these, 556 were participants at  
249 sites (Pathways A and B have been grouped as the participant experience for both pathways  
250 involved site-based swabbing), 617 were postal participants (Pathway C), and 31 did not  
251 state their pathway.

252

253 A higher proportion of site-based participants agreed to feeling valued (96.0% vs 89.8%,  
254  $p < 0.01$ ), feeling respected (97.1% vs 83.9%,  $p < 0.01$ ), were happy with management of their  
255 results (82.3% vs 73.0%,  $p < 0.01$ ) and knowing who to contact (91.4% vs 81.9%,  $p < 0.01$ ),  
256 compared to postal participants (Fig 2). Overall, 98.2% of participants agreed they would  
257 consider taking part in research again.

258 **Fig 2: Participant research experience survey feedback from participants, divided by**  
259 **pathway.**

260 *Site Pathway (Pathways A and B): Participants swabbing at hospital sites*

261 *Postal Pathway (Pathway C): Participants swabbing at home*

262

263 The three most mentioned themes in the qualitative data from the survey were 'Taking part  
264 in SIREN creates a sense of contribution', 'Logistics of the study', and 'Participant Results'.  
265 Within the 'Contribution' theme, participants felt that informing research/policy was an  
266 important factor in contributing to their participation in research. One example was:

267 *"If taking part helps with the good research and you gain better understanding of*  
268 *these viruses, I'm happy to continue".*

269 Within 'Participant Results', participants felt that not being informed early enough about their  
270 infection and antibody status was a disadvantage of the sub-study, compared to previous  
271 SIREN study protocols. A common suggestion was:

272 *"having results more frequently".*

273 Participants reported more logistical issues in the postal pathway regarding receiving and  
 274 returning swabs compared to site-based swabbing. A challenge was familiarising themselves  
 275 with new practises, i.e., posting swabs themselves. A suggested improvement was:

276 *“having the swabs sent out earlier and in bulk as [the] first samples were hit by a*  
 277 *postal strike”.*

278 Although participants did not receive incentives, this was not a deterrent to participation. For  
 279 a comprehensive overview of themes and counts, see

280

281 Table 3.

282

283 **Table 3: Participant research experience survey**

| Theme                                                | Code                                                                               | Sites | Postal | Unspecified | Total |
|------------------------------------------------------|------------------------------------------------------------------------------------|-------|--------|-------------|-------|
| Taking part in SIREN creates a sense of contribution | Belief that taking part in SIREN contributes to society and/or research and policy | 208   | 253    | 14          | 475   |
|                                                      | Taking part in SIREN makes them feel valued                                        | 14    | 2      | 0           | 16    |
| Participant Results                                  | Participant knowledge of respiratory virus and antibody status                     | 135   | 24     | 8           | 167   |
|                                                      | Participants received no/delayed results                                           | 24    | 86     | 1           | 111   |
|                                                      | Participants want detailed results/feedback                                        | 26    | 4      | 0           | 30    |
| Logistics of the Study                               | Ease of study logistics for participants                                           | 75    | 92     | 2           | 169   |
|                                                      | Swab/survey synchronisation                                                        | 1     | 43     | 0           | 44    |
|                                                      | Posting difficulties/convenience of sites                                          | 0     | 29     | 0           | 29    |
|                                                      | Received unexpected number of swabs                                                | 1     | 25     | 0           | 26    |
|                                                      | Issues travelling to site                                                          | 11    | 1      | 0           | 12    |
|                                                      | Posting more convenient than on-site testing                                       | 0     | 10     | 1           | 11    |
|                                                      | Issues with phlebotomy                                                             | 9     | 1      | 0           | 10    |
| Issues with swabbing                                 | 3                                                                                  | 5     | 1      | 9           |       |
| Communication                                        | Friendly/efficient site teams                                                      | 75    | 6      | 3           | 84    |

|                            |                                 |    |    |   |    |
|----------------------------|---------------------------------|----|----|---|----|
|                            | Poor communication from SIREN   | 22 | 52 | 0 | 74 |
|                            | Good communication from SIREN   | 23 | 25 | 1 | 49 |
|                            | Reminders to test               | 5  | 11 | 1 | 17 |
| Personal benefit           | Learning about science/ results | 7  | 4  | 0 | 11 |
|                            | Need for incentives             | 2  | 6  | 0 | 8  |
| Surveys                    | Issues with survey/forms        | 4  | 11 | 0 | 15 |
| Wish for SIREN to continue |                                 | 12 | 2  | 0 | 14 |

284

285

## 286 UKHSA SIREN research team workshop

287 Twenty out of twenty-one researchers attended the workshop and provided feedback  
 288 on study delivery. A variety of staff groups were represented, including laboratory, data  
 289 systems, clinical, operations, and leadership. Thematic analysis of the Winter Pressures  
 290 sub-study workshop identified “Communications” and “Collaboration” as the most mentioned  
 291 themes (Table 4). Effective internal communications were key to sub-study delivery,  
 292 including using the “*monthly meeting to update the wider team*” and the importance of  
 293 gaining the “*consensus of [the] whole team*”. External communications, such as ‘*clear,*  
 294 *considered participant communications*’ and ‘*engaging the right partners at the right time*’  
 295 were also important. Key challenges faced included team resourcing challenges with  
 296 multiple concurrent projects leading to a ‘*need to prioritise*’ and the need for clear set-up  
 297 timelines, particularly when working with external partners, for example: ‘*Give sites*  
 298 *deadlines and accept that some barriers are too difficult to overcome*’.

299 **Table 4: UKHSA research team workshop**

| Themes        | Sub-themes                                                                           | Count |
|---------------|--------------------------------------------------------------------------------------|-------|
| Communication | Communication between the UKHSA SIREN team and external stakeholders                 | 14    |
|               | UKHSA SIREN team internal communications                                             | 11    |
| Collaboration | Engaging the most relevant collaborators                                             | 11    |
|               | Organisational support between the SIREN team, the wider UKHSA and external partners | 9     |
|               | Clear UKHSA SIREN team roles                                                         | 4     |

|                              |                                                                                                     |    |
|------------------------------|-----------------------------------------------------------------------------------------------------|----|
| Strategy and Structures      | Effective planning, process design, and contingency planning                                        | 10 |
|                              | Setting study aims and objectives                                                                   | 6  |
|                              | Regular agreement and discussion within the UKHSA SIREN team                                        | 5  |
|                              | Quality assurance and monitoring                                                                    | 2  |
| Timescales                   | Includes timescales, deadlines, and parallel processes                                              | 21 |
| Resources and Prioritisation | Includes use of wider support from UKHSA and collaborators, prioritisation, and financial processes | 15 |

300

## 301 Discussion

302 The SIREN Winter Pressures sub-study 2022/23 involved rapid adjustment of the SIREN  
303 study protocol. Modifying the multi-centre study to switch to multiplex analysis of PCR tests  
304 proved challenging to achieve at pace, so a new postal pathway was rapidly established.  
305 This evaluation provides an opportunity to reflect and compare the site-based (A and B) and  
306 postal (C) swabbing and testing pathways.

307

308 Compared to the postal pathway, set up and delivery of site-based pathways proved time-  
309 intensive and lacked standardisation, leading to more complexity, often missing data, and  
310 creating barriers to effective timely data collection. The postal pathway enabled target  
311 recruitment to be achieved (7,774/7,500). However, with only 60.9% of participants testing  
312 for influenza, and the prolonged switch to multiplex resulting in testing starting after the  
313 influenza peak, this impacted the utility of data collected (Table 1) (13). This meant we were  
314 unable to conduct the planned analyses, including seasonal flu vaccine effectiveness. The  
315 overall return rate was similar across pathways, with a slightly higher percentage of returned  
316 kits for the postal pathway compared to site-based (80.7% vs 73.7%). This is higher than a  
317 previously reported postal PCR sample return rate of 39.9% (14).

318

319 Multiplex PCR testing coverage was highly varied for sites, with significant differences in the  
320 date when assays were transitioned from monoplex testing (Table 1). Initial recruitment  
321 figures were based on the number of consented participants that had not withdrawn at site

322 start date. However, actual numbers of tests analysed for influenza and RSV were lower  
323 than expected for participants taking part through Pathway A due to delays in local  
324 laboratories switching to multiplex testing (Table 1). In comparison, PCR tests from  
325 Pathways B and C were sent to UKHSA-commissioned laboratories for testing, where all  
326 swabs were analysed using multiplex.

327

328 This delay in sites switching to multiplex, as in Pathway A, could be mitigated by providing  
329 longer lead-in timeframes for site study set-up and a clear deadline for switch-over. This was  
330 highlighted in the SIREN research team workshop. Feedback included the importance of  
331 engaging the right partners at the right time as crucial for set-up. However, not using sites for  
332 study delivery can reduce the time needed for study set-up, as seen in Pathway C. A shorter  
333 timeframe can reduce administrative burden, enable standardisation of testing start-date,  
334 and facilitate testing start date coinciding with the predicted peak of circulating infection  
335 levels.

336

337 A comparison of site-based (A and B) versus postal (C) pathways shows that both options  
338 were acceptable to participants. This was reflected across participant feedback, swab return  
339 rates, and retention. Participants reported positive feedback for both site-based and postal  
340 approaches. A higher proportion of participants in site-based pathways agreed to feeling  
341 valued, feeling respected, were happy with management of their results and knowing who to  
342 contact, compared to the postal pathway. Responses to open questions suggest this may be  
343 due to participants valuing friendly and efficient site teams, although both arms reported a  
344 sense of contribution (see

345

346 Table 3). Overall, 98.2% of participants agreed they would consider taking part in research  
347 again, a higher percentage than the 92% reported by the NIHR Participants in Research  
348 Survey 2022/23 (9).

349



350 Retention was high in both site-based and postal participants, at 96.5% and 87.9%  
351 respectively, which is above the 73.9% overall mean retention reported in metanalysis of  
352 longitudinal cohort studies (15). Participants undergoing postal testing were more likely to  
353 withdraw than those at sites, primarily due to more postal participants reporting that  
354 workload and other commitments prevented them from completing the study. Compared to  
355 participants on the postal pathway, site-based participants were more likely to withdraw due  
356 to logistical challenges. However, all participants took on average the same number of tests,  
357 suggesting this was not a major consideration for most.

358

359 A strength of this mixed methods evaluation of the sub-study is that it incorporates multiple  
360 sources of quantitative and qualitative data. A key limitation is the low participant survey  
361 response rate (15.5%), so feedback may reflect the views of the most engaged  
362 participants but be unrepresentative of the overall cohort. Additionally, while the SIREN  
363 research team feedback had input from all but one team member, it was collected in a team-  
364 led workshop rather than a formalised focus group moderated by independent researchers.  
365 However, UKHSA SIREN team debriefs have now been adapted into the team culture to  
366 support continuous improvement of study delivery.

367

## 368 **Conclusion**

369 The Winter Pressures sub-study was a pragmatic adaptation of the existing SIREN protocol,  
370 which faced real-world challenges impacting data collection. While the target recruitment of  
371 participants was met, the number of returned multiplex test results did not achieve the  
372 intended large-scale seasonal coverage. This evaluation compares the three pathways used  
373 in the sub-study, and supports the postal pathway as an effective format for data collection  
374 that is acceptable to participants and the research team. The postal pathway offers greater

375 control over the end-to-end processes, providing an adaptable and responsive format with  
376 implications for use in pandemic preparedness and for emerging public health threats.  
377

## 378 **Acknowledgements**

379 Our thanks go to the participants in the SIREN study and in particular those who took part in  
380 the Winter Pressures sub-study 2022/23, and completed the evaluation questionnaire. We  
381 would also like to thank the research team and site staff.  
382

## 383 References

- 384 1. Office UGC. COVID-19 Response: Living with COVID-19  
385 [https://www.gov.uk/government/publications/covid-19-response-living-with-covid-19/covid-](https://www.gov.uk/government/publications/covid-19-response-living-with-covid-19/covid-19-response-living-with-covid-192022)  
386 [19-response-living-with-covid-192022](https://www.gov.uk/government/publications/covid-19-response-living-with-covid-19/covid-19-response-living-with-covid-192022) [updated 6th May 2022].
- 387 2. Government A. Australian Influenza Surveillance Report. In: Care DoHaA, editor.  
388 Reporting fortnight: 26 September to 09 October 2022.  
389 [https://www.health.gov.au/sites/default/files/documents/2022/10/aisr-fortnightly-report-no-14-](https://www.health.gov.au/sites/default/files/documents/2022/10/aisr-fortnightly-report-no-14-26-september-to-9-october-2022.pdf2022)  
390 [26-september-to-9-october-2022.pdf2022](https://www.health.gov.au/sites/default/files/documents/2022/10/aisr-fortnightly-report-no-14-26-september-to-9-october-2022.pdf2022).
- 391 3. Broad J, Sparkes D, Platt N, Howells A, Foulkes S, Khawam J, et al. Adapting  
392 COVID-19 research infrastructure to capture Influenza and Respiratory Syncytial Virus  
393 alongside SARS-CoV-2 in UK healthcare workers Winter 2022/23 and beyond: protocol for a  
394 pragmatic sub-study. medRxiv. 2023:2023.09.19.23295789.
- 395 4. Hall VJ, Foulkes S, Charlett A, Atti A, Monk EJM, Simmons R, et al. SARS-CoV-2  
396 infection rates of antibody-positive compared with antibody-negative health-care workers in  
397 England: a large, multicentre, prospective cohort study (SIREN). *The Lancet*.  
398 2021;397(10283):1459-69.
- 399 5. National Academies of Sciences E, Medicine, Health, Medicine D, Board on Health  
400 Sciences P, Forum on Drug Discovery D, et al. The National Academies Collection: Reports  
401 funded by National Institutes of Health. In: Shore C, Khandekar E, Alper J, editors. *Virtual*  
402 *Clinical Trials: Challenges and Opportunities: Proceedings of a Workshop*. Washington (DC):  
403 National Academies Press (US)  
404 Copyright 2019 by the National Academy of Sciences. All rights reserved.; 2019.
- 405 6. Ali Z, Zibert John R, Thomsen Simon F. *Virtual Clinical Trials: Perspectives in*  
406 *Dermatology*. *Dermatology*. 2020;236(4):375-82.

- 407 7. Rogers A DPG, Subbarayan S, et al. A systematic review of methods used to  
408 conduct decentralised clinical trials. *British Journal of Clinical Pharmacology*.  
409 2022;88(6):2843-62.
- 410 8. Moore GF, Audrey S, Barker M, Bond L, Bonell C, Hardeman W, et al. Process  
411 evaluation of complex interventions: Medical Research Council guidance. *bmj*. 2015;350.  
412 9. 2022/23 PRES executive summary NIHR: NIHR; 2023 [updated 19/09/2023].  
413 Available from: <https://www.nihr.ac.uk/documents/202223-pres-executive-summary/34466>.
- 414 10. Ritchie J, Spencer L. Qualitative data analysis for applied policy research. *Analyzing*  
415 *qualitative data*: Routledge; 2002. p. 187-208.
- 416 11. Thomas J, Harden A. Methods for the thematic synthesis of qualitative research in  
417 systematic reviews. *BMC Medical Research Methodology*. 2008;8(1):45.
- 418 12. Braun V, Clarke V. Using thematic analysis in psychology. *Qualitative Research in*  
419 *Psychology*. 2006;3(2):77-101.
- 420 13. UKHSA. Surveillance of influenza and other seasonal respiratory viruses in the UK,  
421 winter 2022 to 2023 2024 [Available from: [https://www.gov.uk/government/statistics/annual-  
422 flu-reports/surveillance-of-influenza-and-other-seasonal-respiratory-viruses-in-the-uk-winter-  
423 2022-to-  
424 2023#:~:text=High%20levels%20of%20influenza%20activity,the%20remainder%20of%20th  
425 e%20season](https://www.gov.uk/government/statistics/annual-flu-reports/surveillance-of-influenza-and-other-seasonal-respiratory-viruses-in-the-uk-winter-2022-to-2023#:~:text=High%20levels%20of%20influenza%20activity,the%20remainder%20of%20the%20season)].
- 426 14. Marchant E, Ready D, Wimbury G, Smithson R, Charlett A, Oliver I. Determining the  
427 acceptability of testing contacts of confirmed COVID-19 cases to improve secondary case  
428 ascertainment. *Journal of Public Health*. 2021;43(3):e446-e52.
- 429 15. Teague S, Youssef GJ, Macdonald JA, Sciberras E, Shatte A, Fuller-Tyszkiewicz M,  
430 et al. Retention strategies in longitudinal cohort studies: a systematic review and meta-  
431 analysis. *BMC Medical Research Methodology*. 2018;18(1):151.



## 433 **Supporting information**

434 **S1 File: Participant research experience survey questions**

435 **S2 File: SIREN study group members**

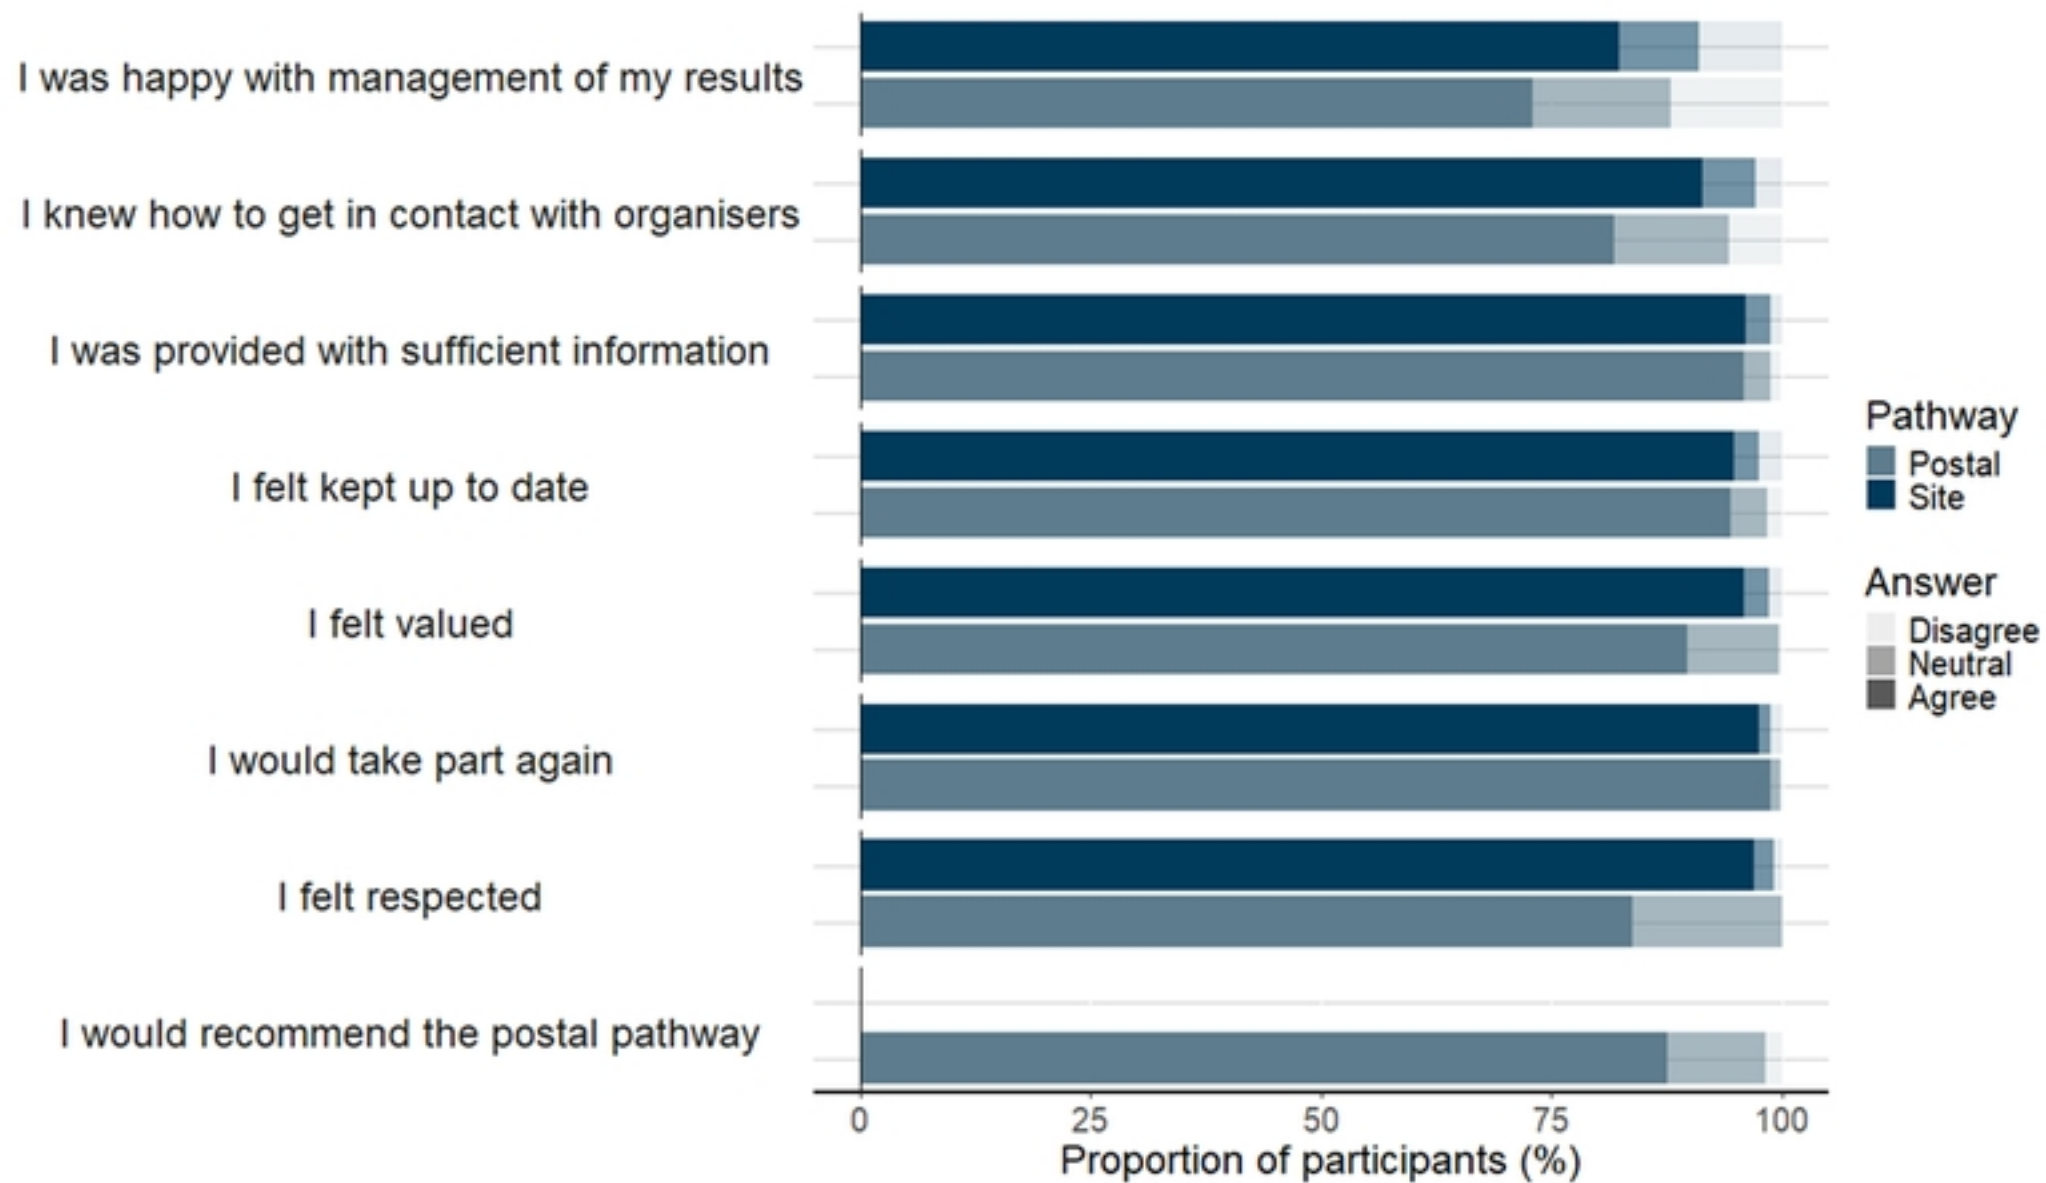

a) Pathway A participants

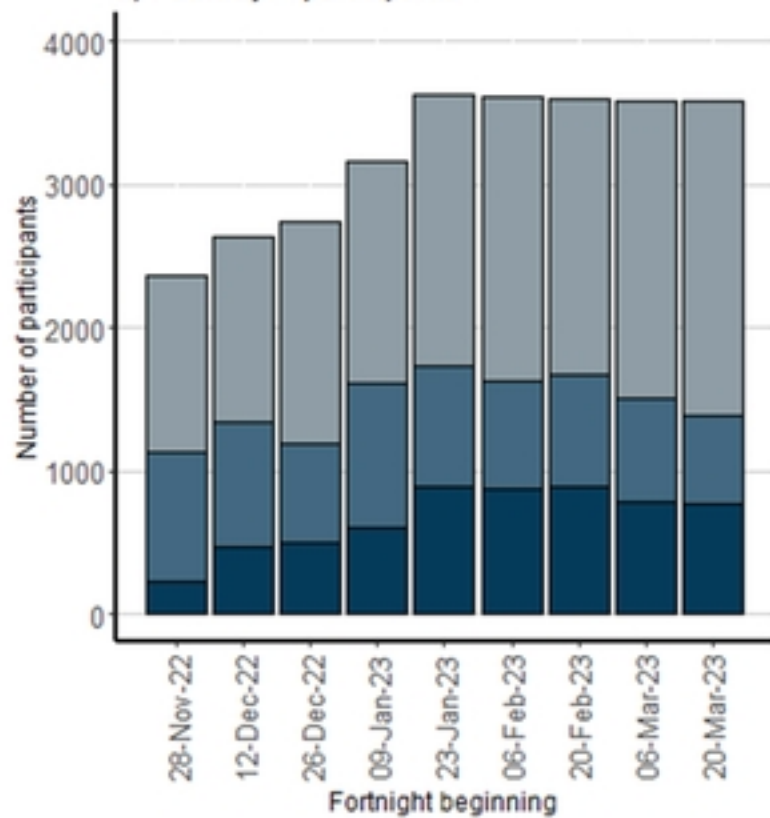

b) Pathway B participants

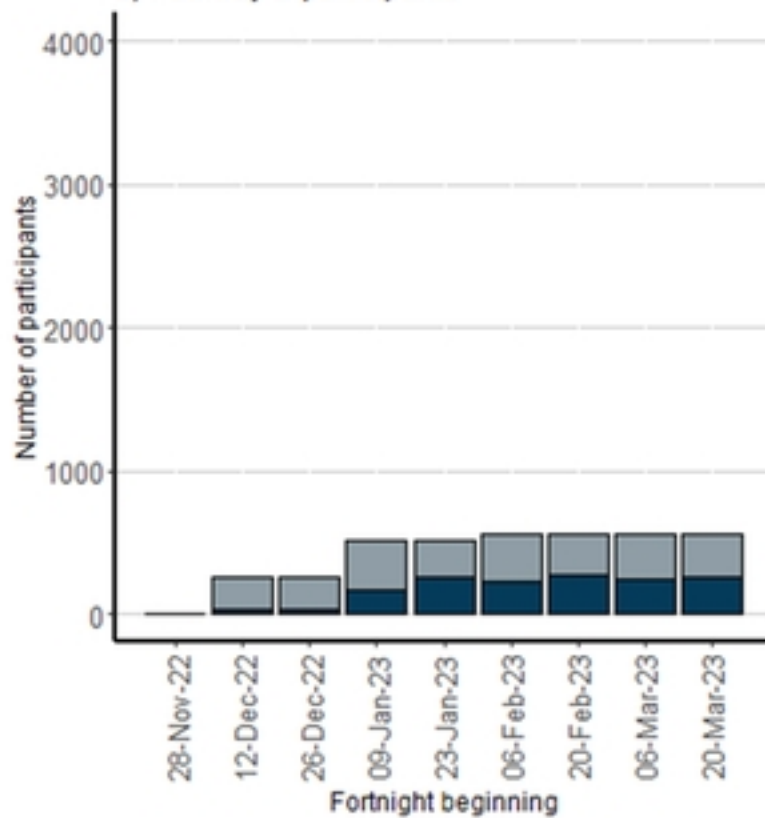

c) Pathway C participants

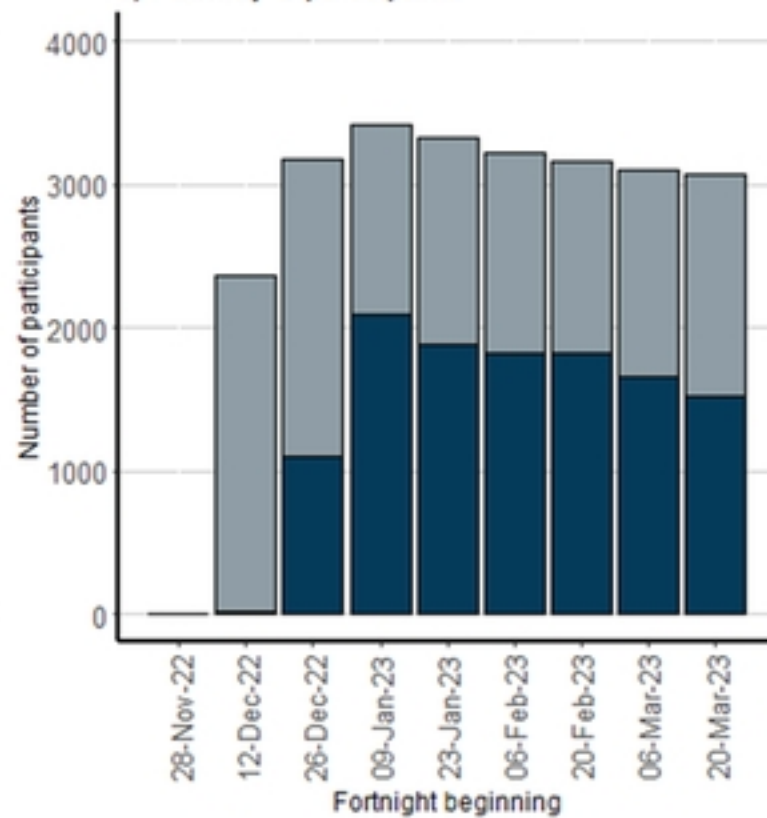

Recruited participants
  Participants tested for SARS-CoV-2 only
  Participants tested for SARS-CoV-2 + influenza/RSV
